# Supplementary material for: A theoretical study on laser cooling feasibility of XH (X = As, Sb and Bi): effects of intersystem crossings and spin–orbit couplings
Source: Royal Society of Chemistry journal article supplement (doi:10.1039/d2cp00387b), 2022-01-01
Supplement: d2cp00387b1.pdf [file d2cp00387b1.pdf]

## Electronic Supplementary Information for:

# A theoretical study on laser cooling feasibility of XH (X = As, Sb and Bi): Effects of intersystem crossings and spin-orbit couplings

*Donghui Li,<sup>ab</sup> Jianwei Cao,<sup>a</sup> Haitao Ma<sup>a</sup> and Wensheng Bian<sup>\*ab</sup>*

<sup>a</sup> Beijing National Laboratory for Molecular Sciences, Institute of Chemistry, Chinese  
Academy of Sciences, Beijing 100190, China

<sup>b</sup> School of Chemical Sciences, University of Chinese Academy of Sciences, Beijing  
100049, China.

E-mail: [bian@iccas.ac.cn](mailto:bian@iccas.ac.cn)

Phone: +86 (0)10 62566307. Fax: +86 (0)10 62563167

|           |    |
|-----------|----|
| Figure S1 | S2 |
| Figure S2 | S2 |
| Figure S3 | S2 |
| Table S1  | S3 |
| Table S2  | S3 |

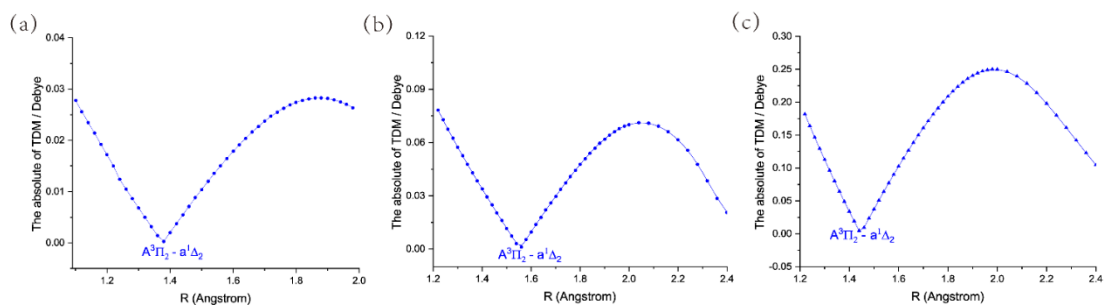

Fig. S1. Transition dipole moments (TDMs) as a function of the interatomic distance (R) for the  $A^3\Pi_2 \rightarrow a^1\Delta_2$  transition of AsH (a), SbH (b) and BiH (c) at the icMRCI+Q level.

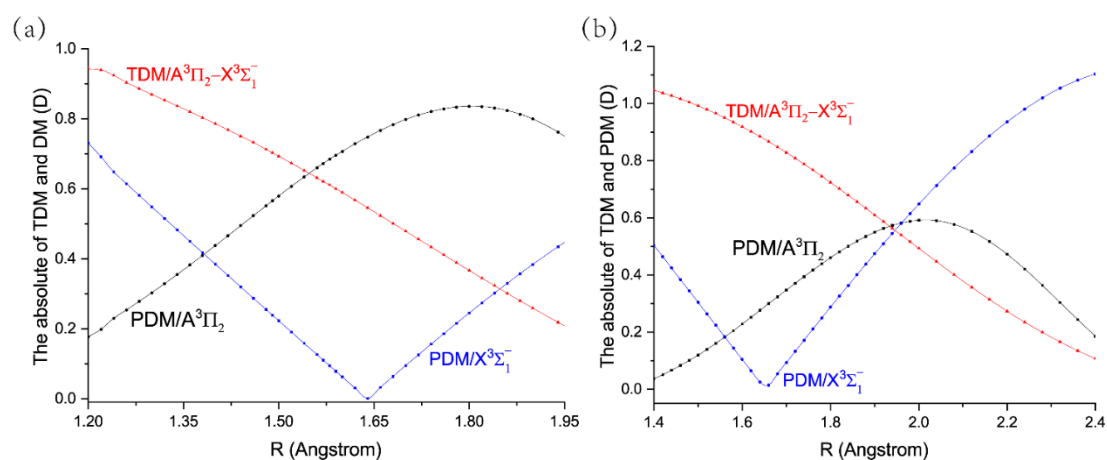

Fig. S2. Permanent dipole moments (PDMs) and transition dipole moments (TDMs) as a function of the interatomic distance (R) for the  $X^3\Sigma_1^-$  and  $A^3\Pi_2$  states of AsH (a) and SbH (b) at the icMRCI+Q level.

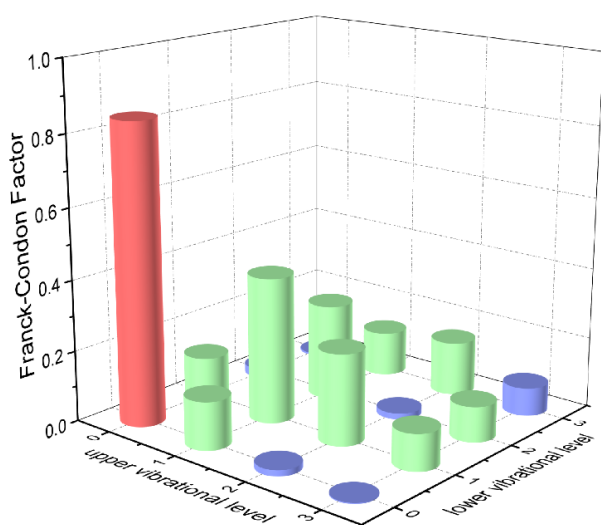

Fig. S3. Franck-Condon factors of the  $A^3\Pi_2 (v' \leq 3) \rightarrow X^3\Sigma_1^- (v \leq 3)$  transitions for AsH, calculated at the icMRCI+Q level.

Table S1 The calculated population loss due to the decay channel of intersystem crossings.

|     | State             | Population loss |
|-----|-------------------|-----------------|
| AsH | $A^3\Pi (v' = 2)$ | 0.0125          |
| SbH | $A^3\Pi (v' = 1)$ | 0.1073          |
| BiH | $A^3\Pi (v' = 1)$ | 0.6247          |

The population loss due to intersystem crossings has been estimated using the Landau–Zener theory.<sup>1,2</sup> As shown in Table S1, the obtained decay probability for AsH ( $v' = 2$ ) of the  $A^3\Pi$  state is 1.3%, and those for SbH ( $v' = 1$ ) and BiH ( $v' = 1$ ) are 10.7% and 62.5%, respectively.

Table S2 Comparison of the relevant properties for laser cooling of several hydrides.

|     | $R_{00}$ <sup>a</sup> | $\tau_{v'}$ (ns) <sup>a</sup> | $T_{Doppler}$ ( $\mu$ K) <sup>a</sup> | $T_{Recoil}$ ( $\mu$ K) | $\lambda_{00}$ (nm) <sup>a</sup> |
|-----|-----------------------|-------------------------------|---------------------------------------|-------------------------|----------------------------------|
| AsH | 0.9662                | 914                           | 4.18                                  | 2.20                    | 338.3                            |
| SbH | 0.9248                | 883                           | 4.33                                  | 1.13                    | 373.4                            |
| BaH | 0.9639 <sup>b</sup>   | 120.3 <sup>c</sup>            | 31.7 <sup>c</sup>                     | 0.168 <sup>c</sup>      | 905 <sup>d</sup>                 |
| CH  | 0.983 <sup>e</sup>    | 536 <sup>f</sup>              | 7.13 <sup>f</sup>                     | 7.91 <sup>f</sup>       | 430.9 <sup>e</sup>               |
| SiH | 0.9954 <sup>g</sup>   | 575 <sup>g</sup>              | 6.65 <sup>g</sup>                     | 3.89 <sup>g</sup>       | 412.6 <sup>g</sup>               |

<sup>a</sup> These columns correspond to the main cooling transition. <sup>b</sup> Ref. 3. <sup>c</sup> Ref. 4. <sup>d</sup> Ref. 5. <sup>e</sup> Ref. 6. <sup>f</sup> Ref. 7. <sup>g</sup> Ref. 8.

## Notes and references

- 1 C. Zener, *Proc. R. Soc. London, Ser. A*, 1932, **137**, 696-702.
- 2 J. N. Harvey and M. Aschi, *Faraday Discuss.*, 2003, **124**, 129-143.
- 3 I. C. Lane, *Phys. Rev. A*, 2015, **92**, 022511.
- 4 K. Moore and I. C. Lane, *J. Quant. Spectrosc. Radiat. Transfer*, 2018, **211**, 96-106.
- 5 Y. Gao and T. Gao, *Phys. Rev. A*, 2014, **90**, 052506.
- 6 J. Cui, J. Xu, J. Qi, G. Dou, and Y. Zhang, *Chin. Phys. B*, 2018, **27**, 103101.
- 7 N. Wells and I. C. Lane, *Phys. Chem. Chem. Phys.*, 2011, **13**, 19036-19051.
- 8 D. Li, M. Fu, H. Ma, W. Bian, Z. Du, and C. Chen, *Front. Chem.*, 2020, **8**, 20.
